CORRECTION

# Correction: The overlap between autistic spectrum conditions and borderline personality disorder

Robert B. Dudas, Chris Lovejoy, Sarah Cassidy, Carrie Allison, Paula Smith, Simon Baron-Cohen

There is an error in the first sentence of the Results section of the Abstract. The correct sentence is: On the AQ, the comorbid group scored higher than the ASC group, who in turn scored higher than the BPD group, who scored higher than controls.

## Reference

1. Dudas RB, Lovejoy C, Cassidy S, Allison C, Smith P, Baron-Cohen S (2017) The overlap between autistic spectrum conditions and borderline personality disorder. PLoS ONE 12(9): e0184447. <https://doi.org/10.1371/journal.pone.0184447> PMID: 28886113

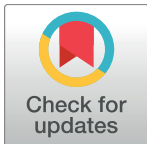

## OPEN ACCESS

**Citation:** Dudas RB, Lovejoy C, Cassidy S, Allison C, Smith P, Baron-Cohen S (2018) Correction: The overlap between autistic spectrum conditions and borderline personality disorder. PLoS ONE 13(1): e0190727. <https://doi.org/10.1371/journal.pone.0190727>

**Published:** January 2, 2018

**Copyright:** © 2018 Dudas et al. This is an open access article distributed under the terms of the [Creative Commons Attribution License](https://creativecommons.org/licenses/by/4.0/), which permits unrestricted use, distribution, and reproduction in any medium, provided the original author and source are credited.
